# Supplementary material for: Immunoaffinity monoliths for multiplexed extraction of preterm birth biomarkers from human blood serum in 3D printed microfluidic devices
Source: Royal Society of Chemistry journal article supplement (doi:10.1039/d1an01365c), 2022-01-01
Supplement: d1an01365c1.pdf [file d1an01365c1.pdf]

**Supplementary Information for:**

**Immunoaffinity Monoliths for Multiplexed Extraction of Preterm Birth Biomarkers from Human Blood Serum in 3D Printed Microfluidic Devices**

Haifa M. Almughamsi,<sup>a</sup> Karyna M. Howell,<sup>a</sup> Samuel R. Parry,<sup>a</sup> Joule E. Esene,<sup>a</sup> Jacob B. Nielsen,<sup>a</sup> Gregory P. Nordin,<sup>b</sup> and Adam T. Woolley<sup>a</sup>

<sup>a</sup> *Department of Chemistry and Biochemistry, Brigham Young University, Provo, UT 84602, USA*

<sup>b</sup> *Department of Electrical and Computer Engineering, Brigham Young University, Provo, UT, 84602, USA*

\*corresponding author: atw@byu.edu; 1-801-422-1701

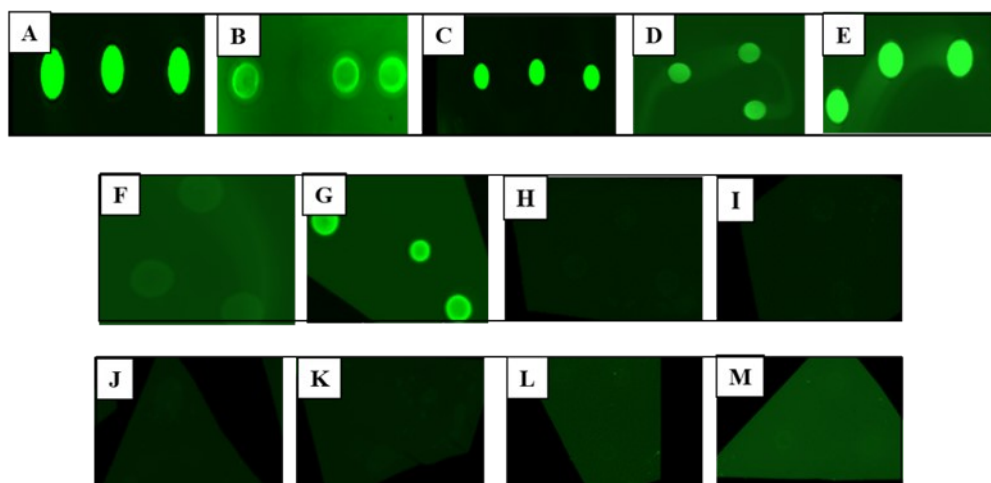

**Figure S1.** Dot blot assays on nitrocellulose membranes. Three replicate 2  $\mu$ L dots of (A) positive control with ferritin and anti-ferritin; (B) CRF and anti-CRF; (C) TNF and anti-TNF; (D) TAT and anti-TAT; (E) thrombin and anti-TAT; (F) antithrombin and anti-TAT; (G) Thrombin and anti-ferritin. (H) CRF and anti-TNF; (I) CRF and anti-TAT; (J) TAT and anti-TNF; (K) TAT and anti-CRF; (L) TNF and anti-TAT; (M) TNF and anti-CRF.

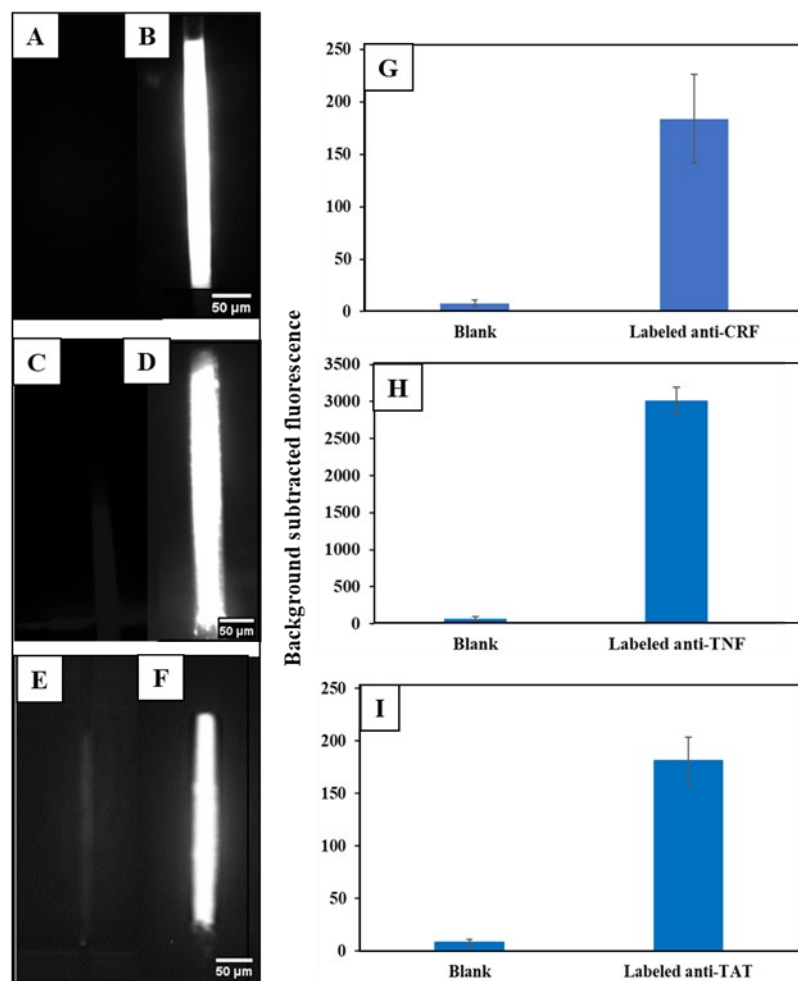

**Figure S2.** Labeled antibody attachment to monoliths. Fluorescence images of (A, C, E) control monoliths and fluorescently labeled monoclonal (B) anti-CRF, (D) anti-TNF, and (F) anti-TAT. Background-subtracted fluorescence of the monoliths before and after immobilization of labeled (G) anti-CRF, (H) anti-TNF, and (I) anti-TAT. Error bars show the standard deviation for three replicates.

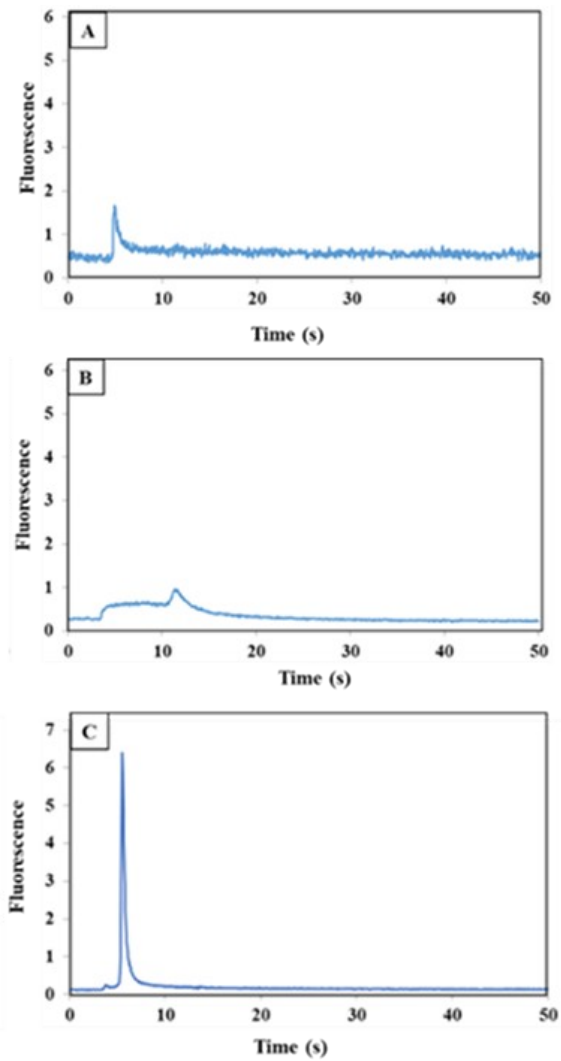

**Figure S3** Fluorescence during elution after extraction of labeled (A) 30 nM TNF, (B) 60 nM TAT and (C) TNF (30 nM) and TAT (60 nM) from spiked diluted serum using a control monolith lacking attached antibodies (blue).
